# Supplementary material for: The Posttraumatic Increase of the Adhesion GPCR EMR2/ADGRE2 on Circulating Neutrophils Is Not Related to Injury Severity
Source: MDPI journal article supplement (doi:10.3390/cells12222657), 2023-11-20
Supplement: s1 [file s1]

Supplementary Materials

# The Posttraumatic Increase of the Adhesion GPCR EMR2/*ADGRE2* on Circulating Neutrophils Is Not Related to Injury Severity

Leyu Zheng <sup>1</sup>, Moujie Rang <sup>1</sup>, Carolin Fuchs<sup>1</sup>, Annette Keß<sup>1</sup>, Mandy Wunsch <sup>1</sup>, Julia Hentschel <sup>2</sup>, Cheng-Chih Hsiao <sup>3</sup>, Christian Kleber <sup>1</sup>, Georg Osterhoff <sup>1#</sup> and Gabriela Aust <sup>1,4\*#</sup>

<sup>1</sup> Research Laboratories and Department of Orthopaedics, Trauma and Plastic Surgery (OUP), Leipzig University and University Hospital Leipzig; Leipzig, Germany; leyu.zheng@medizin.uni-leipzig.de

<sup>2</sup> Institute of Human Genetics, Leipzig University and University Hospital Leipzig; Leipzig, Germany ;

<sup>3</sup> Department of Experimental Immunology, Amsterdam Institute for Infection and Immunity, Amsterdam University Medical Centers; Amsterdam, The Netherlands

<sup>4</sup> Research Laboratories and Department of Visceral, Transplantation, Vascular and Thoracic Surgery (VTTG), Leipzig University and University Hospital Leipzig; Leipzig, Germany

\* Correspondence: gabriela.aust@medizin.uni-leipzig.de

# These authors contributed equally to this work

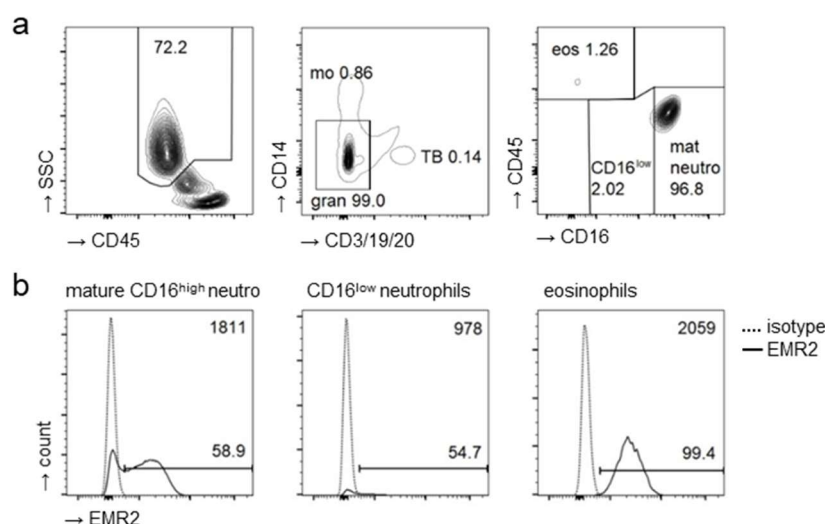

**Figure S1.** Flow cytometric analysis of EMR2 on peripheral leukocytes

a, b) Analysis of CD16<sup>high</sup> and CD16<sup>low</sup> neutrophils of an injured patient (ISS 32) 24 h after trauma. a) Main gating strategy for neutrophilic granulocytes (percentage of positive cells of all cells); mo monocytes, gran granulocytes, TB T- and B-cells, mat neutro mature neutrophils, eos eosinophils; b): Median fluorescence intensity (MFI; right upper corner) of isotype control- and EMR2 mAb-stained cells; the percentage of EMR2<sup>+</sup> cells is indicated at the gate.

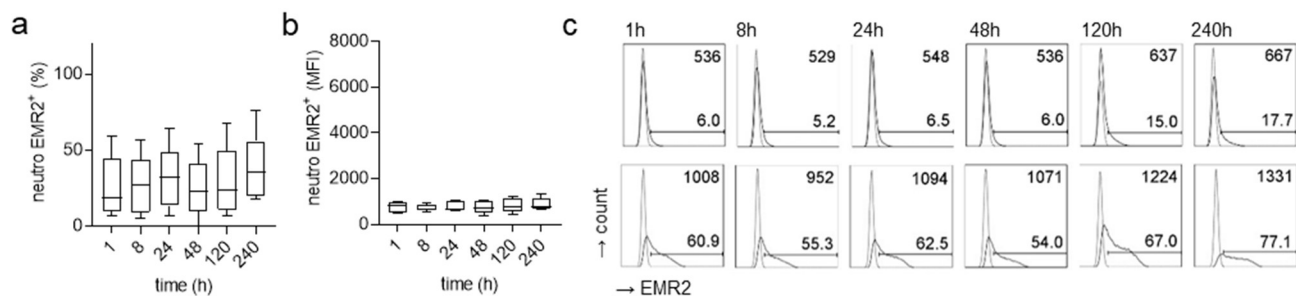

**Figure S2.** 240 h time course of EMR2 on circulating neutrophils of uninjured volunteers

(a) Percentage of EMR2<sup>+</sup> neutrophils (a) and MFI of EMR2 on neutrophils (b), n= 5 volunteers.

(c) Time course of EMR2 on neutrophils in one typical volunteer (upper panel). In the lower panel a volunteer with a constantly high percentage of EMR2<sup>+</sup> neutrophils is shown. The percentage of EMR2<sup>+</sup> cells is indicated at the gate, MFI of EMR2<sup>+</sup> cells is shown in the upper right corner.

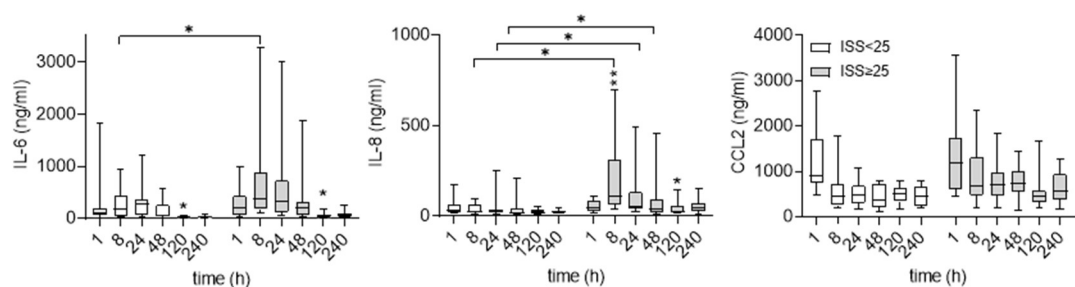

**Figure S3.** Posttraumatic time course of circulating cytokines

Comparison between patient groups ISS < 25 (9-24) and ISS ≥ 25, t-test (IL-6), U-test (IL-8, CCL2); comparison between consecutive time points in one patient group: ANOVA, only significant changes related to the previous time point are shown; \*p<0.05).

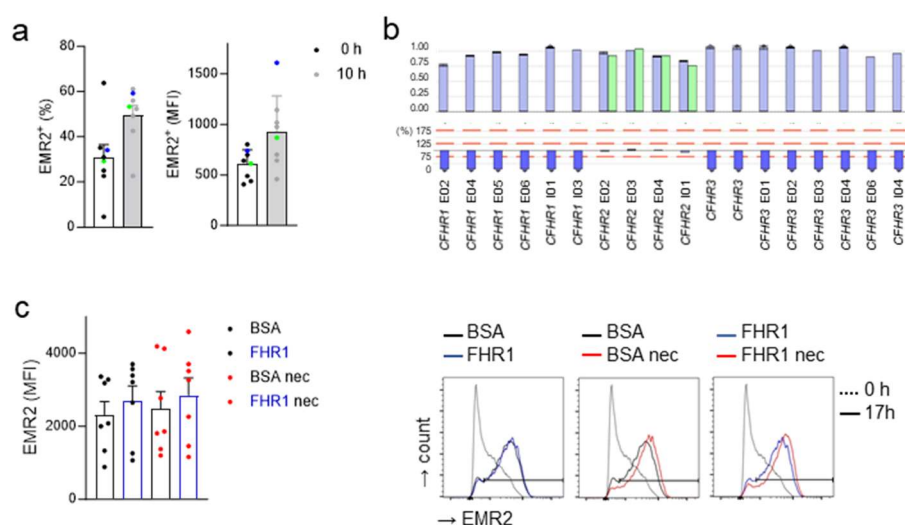

**Figure. S4** FHR1 is not involved in the increase of EMR2 on neutrophils *in vitro*

(a, b) Leukocytes were cultured in RPMI1640/10% serum of the respective cell donor. EMR2 on neutrophils was quantified (a) before (0 h) and after 10 h by flow cytometry (n= 8 volunteers). 2 out of the 8 (2/8) volunteers, indicated by the colored dots in the graphs, were *CFHR1*-deficient, but they showed also a neutrophilic EMR2 increase; (b) MLPA analysis of the *CFHR1-3* target region. Upper trace: grey = mean value of 3 volunteers without, green = one volunteer with homozygous *CHFR1/CFHR3* deletion. Values between 0.75-1.25 display copy numbers of 2, as seen for the region *CFHR2*, while *CFHR1* and *CFHR3* revealed no signal for the target region, which means homozygous deletion. Lower trace: ratio between volunteers with/without deletion (%); 100 % means no difference between both. (c) Leukocytes were cultured either in BSA- or FHR1-coated wells with or without necrotic cells for 17 h. Afterwards the cells were stained and the expression of EMR2 on neutrophils was quantified by flow cytometry (n=7 donors). Right: One typical experiment of one donor is shown.

**Table S1** Trauma classification based on the abbreviated injury scale (AIS)

| Trauma group             | Injuries               | ISS<25<br>(n=9) | ISS≥25<br>(n=25) | p-value# |
|--------------------------|------------------------|-----------------|------------------|----------|
| Neurotrauma              | Traumatic brain injury | 1               | 12               | 0.107    |
|                          | Spinal cord injury     | 0               | 4                | 0.554    |
| Facial trauma            | Eye injury             | 1               | 3                | 1.000    |
|                          | Fractured face         | 1               | 7                | 0.403    |
|                          | Open wound face        | 3               | 1                | 0.048    |
| Neck trauma              | Esophageal trauma      | 0               | 1                | 1.000    |
|                          | Tracheal trauma        | 0               | 1                | 1.000    |
| Thoracic trauma          | Internal organs injury | 2               | 20               | 0.004    |
|                          | Other injuries         | 4               | 17               | 0.254    |
| Abdominal trauma         | Internal organs injury | 2               | 12               | 0.250    |
|                          | Other injuries         | 0               | 6                | 0.162    |
| Spinal trauma            | Fracture               | 4               | 12               | 1.000    |
|                          | Luxation/distortion    | 0               | 1                | 1.000    |
| Upper extremities trauma | Fracture               | 4               | 11               | 1.000    |
|                          | Luxation/distortion    | 1               | 1                | 0.465    |
| Pelvic trauma            | Fracture               | 2               | 16               | 0.052    |
| Lower extremities trauma | Fracture               | 7               | 12               | 0.240    |
|                          | Luxation/distortion    | 1               | 4                | 1.000    |

#Fisher's exact test

**Table S2** Antibodies (Abs) and dyes used in flow cytometry

| antigen, fluorophore                                                          | clone  | company, catalog number                                       |
|-------------------------------------------------------------------------------|--------|---------------------------------------------------------------|
| Abs for the clinical study                                                    |        |                                                               |
| CD14 BUV395                                                                   | MφP9   | Becton Dickinson GmbH (BD, Heidelberg, Germany) 563561        |
| CD16 BUV737                                                                   | 3G8    | BD, 612786                                                    |
| CD45 BB515                                                                    | HI30   | BD, 564585                                                    |
| EMR2 APC                                                                      | 2A1    | Bio-Rad Lab GmbH (Feldkirchen, Germany), MCA2330A647T         |
| CD3 BV510*                                                                    | UCHT1  | BD, 563109                                                    |
| CD19 BV510*                                                                   | SJ25C1 | BD, 562947                                                    |
| CD20 BV510*                                                                   | 2H7    | BD, 563067                                                    |
| Abs and dyes additionally used for neutrophilic EMR2 analyses <i>in vitro</i> |        |                                                               |
| CD62L PE <sup>#</sup>                                                         | REA615 | Miltenyi Biotec GmbH (Bergisch Gladbach, Germany) 130-114-151 |
| CD11b Vio Bright B515 <sup>#</sup>                                            | REA713 | Miltenyi, 130-131-818                                         |
| CD11c PE-Cy7                                                                  | B-Ly6  | BD, 561356                                                    |
| EMR2 PE <sup>#</sup>                                                          | REA302 | Miltenyi, 130-119-770                                         |
| Fixable Viability Dye BV605                                                   |        | BD, 565694                                                    |

\*BV510 dump channel: CD3, CD19 and CD20 identify T and B cells, which are not of interest in this study; only CD45<sup>+</sup> CD3/19/20<sup>-</sup> cells are carried forward for analyses.

**Disclaimer/Publisher's Note:** The statements, opinions and data contained in all publications are solely those of the individual author(s) and contributor(s) and not of MDPI and/or the editor(s). MDPI and/or the editor(s) disclaim responsibility for any injury to people or property resulting from any ideas, methods, instructions or products referred to in the content.
